# Supplementary material for: Snow Persistence Explains Stream High Flow and Low Flow Signatures with Differing Relationships by Aridity and Climatic Seasonality
Source: Copernicus journal article supplement (doi:10.5194/hess-2022-106), 2022-03-21
Supplement: Supplementary file 1 [file hess-2022-106-supplement.pdf]

Supporting Information for

5 **Snow Persistence Explains Stream High Flow and Low Flow  
Signatures with Differing Relationships by Aridity and Climatic  
Seasonality**

Edward Le<sup>1</sup>, Ali A. Ameli<sup>1\*</sup>, Joseph Janssen<sup>1</sup>, John Hammond<sup>2</sup>

10 <sup>1</sup> Department of Earth, Ocean and Atmospheric Sciences, The University of British Columbia, Vancouver, British Columbia,  
Canada

<sup>2</sup> Department of Ecosystem Science and Sustainability, Colorado State University, Fort Collins, CO, USA

# Now at U.S. Geological Survey, MD-DE-DC Water Science Center, Baltimore, MD, USA

**Contents of this file.**

15 Figures S1, S2, S3, S4, S5

**Introduction**

This supporting information includes five figures containing model diagnostics for multivariate linear regressions for the five hydrological signatures used in this study, including the baseflow index (BFI; Fig. S1), normalized  $Q_5$  (Fig. S2), the slope of low flow duration curve (Low-FDC; Fig. S3), normalized  $Q_{95}$  (Fig. S4), and the slope of high flow duration curve (High-FDC; Fig. S5). Variable transformations and statistical procedures are listed in Table 1 of the main paper.

20

## BFI Model Diagnostics

(a) Residual Plot

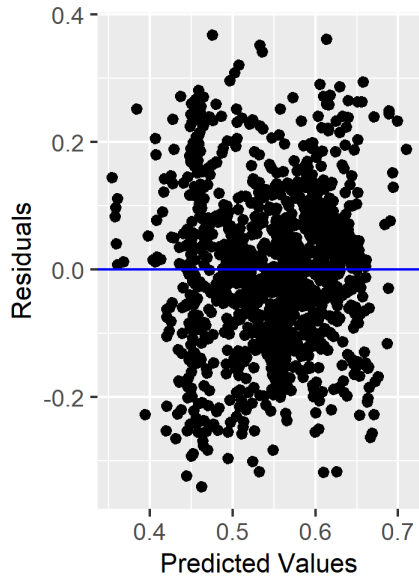

(b) QQ Plot

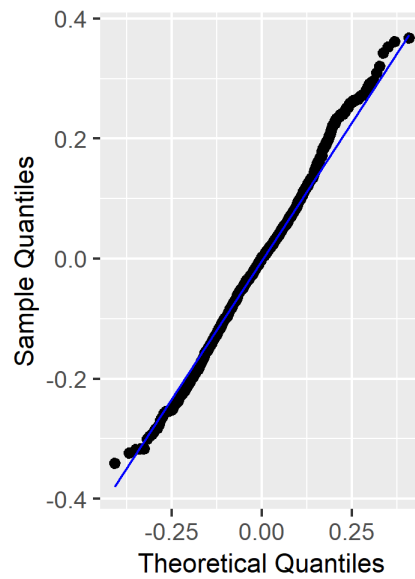

(c) Histogram

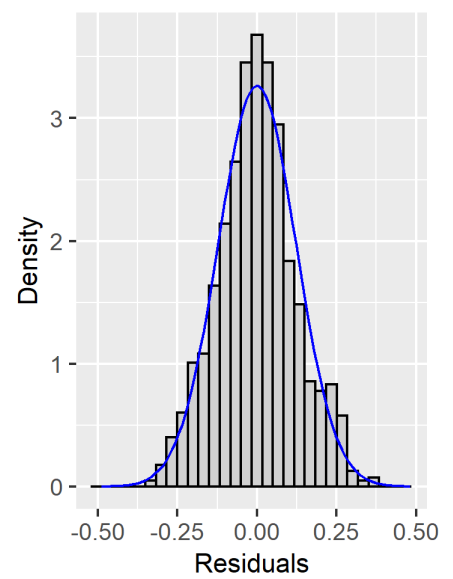

25

**Figure S1: Diagnostic plots for multivariate linear regression model of baseflow index (BFI). (a) residual plot, (b) Quantile-Quantile (QQ) plot, and (c) residual histogram.**

## Normalized $Q_5$ Model Diagnostics

(a) Residual Plot

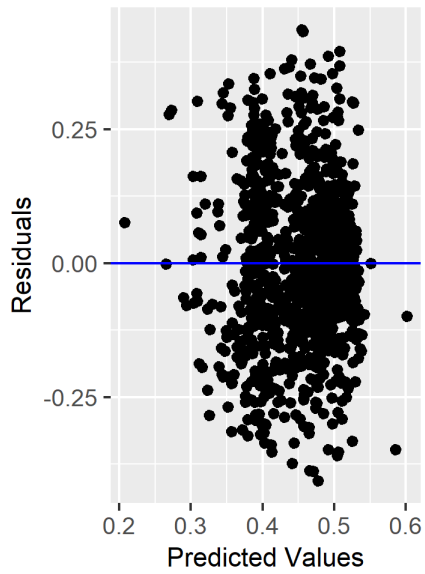

(b) QQ Plot

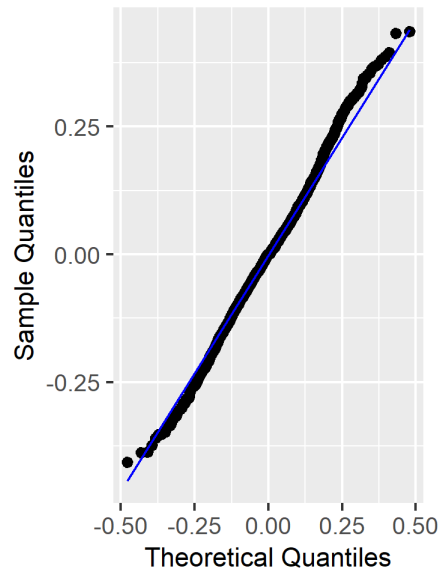

(c) Histogram

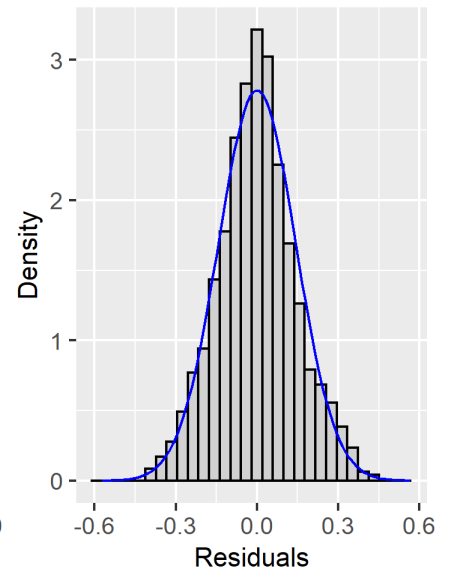

30 **Figure S2: Diagnostic plots for multivariate linear regression model of normalized  $Q_5$ . (a) residual plot, (b) Quantile-Quantile (QQ) plot, and (c) residual histogram.**

# Low-FDC Model Diagnostics

(a) Residual Plot

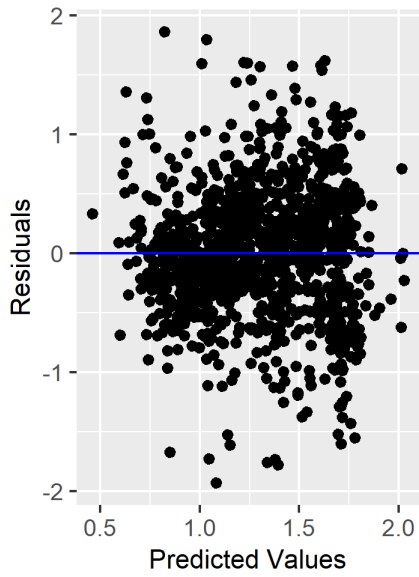

(b) QQ Plot

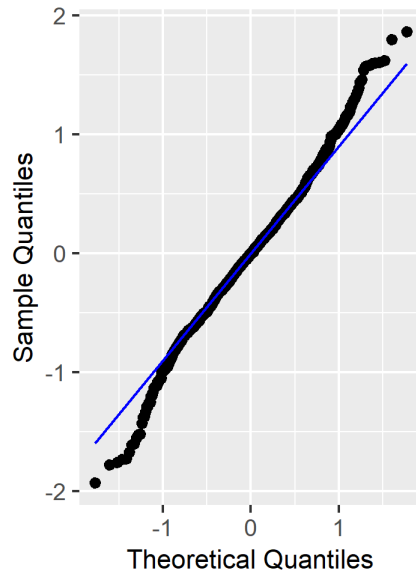

(c) Histogram

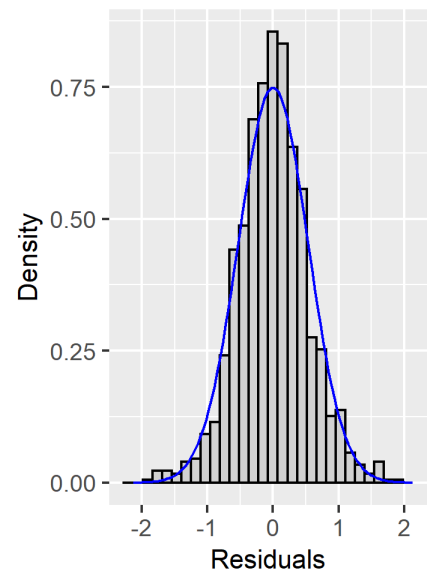

**Figure S3: Diagnostic plots for multivariate linear regression model of the slope of the flow duration curve at low flow (Low-FDC). (a) residual plot, (b) Quantile-Quantile (QQ) plot, and (c) residual histogram.**

## Normalized $Q_{95}$ Model Diagnostics

(a) Residual Plot

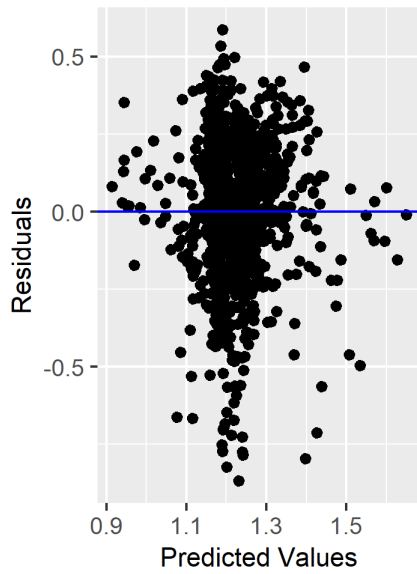

(b) QQ Plot

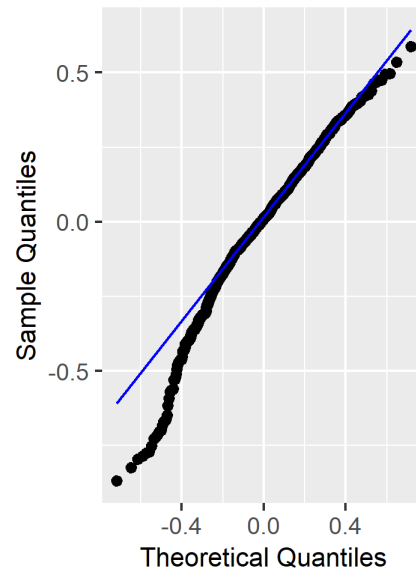

(c) Histogram

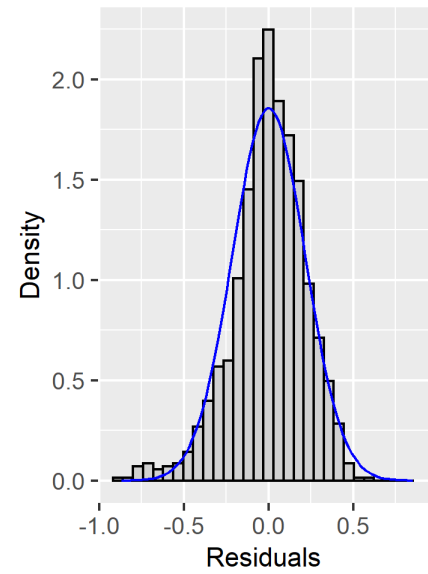

35 **Figure S4: Diagnostic plots for multivariate linear regression model of normalized  $Q_{95}$ . (a) residual plot, (b) Quantile-Quantile (QQ) plot, and (c) residual histogram.**

# High-FDC Model Diagnostics

(a) Residual Plot

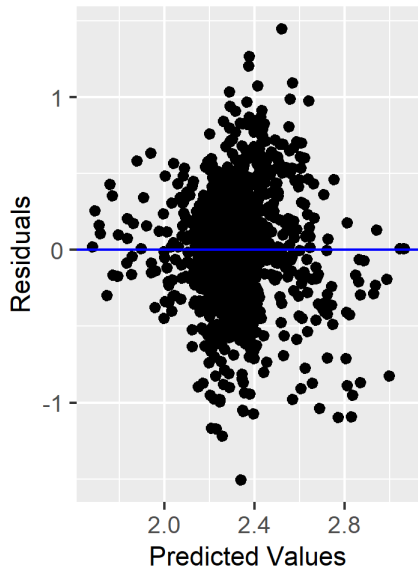

(b) QQ Plot

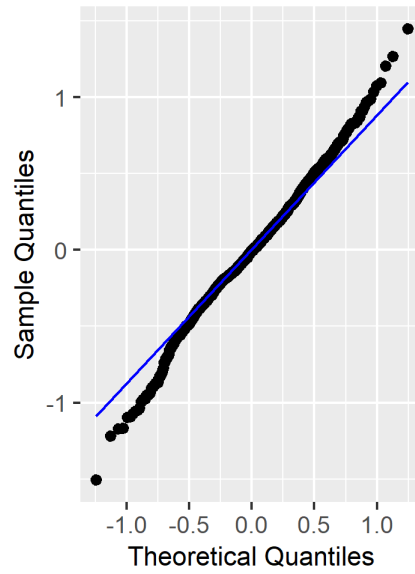

(c) Histogram

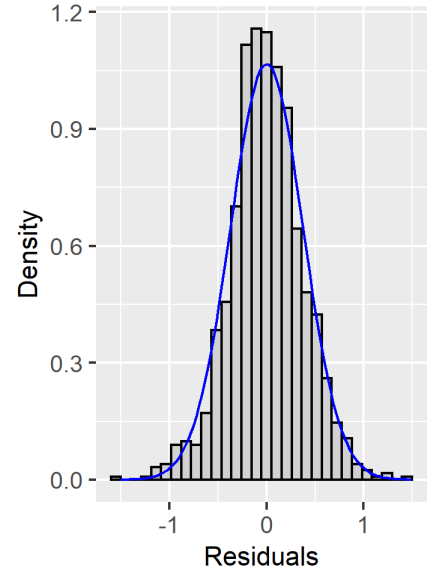

**Figure S5: Diagnostic plots for multivariate linear regression model of the slope of flow duration curve at high flow (High-FDC). (a) residual plot, (b) Quantile-Quantile (QQ) plot, and (c) residual histogram.**
